# Supplementary material for: Mobile Introns Shape the Genetic Diversity of Their Host Genes
Source: Oxford University Press journal article supplement (doi:10.1534/genetics.116.199059), 2017-02-13
Supplement: figure_s1.pdf [file figure_s1.pdf]

Figure S 1 – Elevated SNP density at mitochondrial 5' and 3' intron-exon boundaries in *S. cerevisiae*.
